# Supplementary material
Source: PubMed Central journal article supplement (PMC3294927)
Supplement: supp_56.3.1382_Table_S1-S2_AAC05280-11R1.pdf [file supp_56.3.1382_Table_S1-S2_AAC05280-11R1.pdf]

**TABLE S1.** Primer sequence used for PCR and RT PCR.

| Gene                   | Primer          | sequence                                                   | annealing temperature | Reference |
|------------------------|-----------------|------------------------------------------------------------|-----------------------|-----------|
| <i>Pfmdr1</i>          | M11             | <u>CTCGAGGAATTCGGATCCTGTTGAAAGATGGGTAAAGAGCAGAAAGAG</u>    | 58°C                  | This work |
|                        | M12             | <u>TCTAGAAAGCTTGGATCCTACTTTCTTATTACATATGACACCACAAACA</u>   |                       |           |
|                        | M21             | <u>CTCGAGGAATTCGGATCCCGTTAATTTATGTTTGTGGTG</u>             |                       |           |
|                        | M22             | <u>TCTAGAAAGCTTGGATCCAAATAATTGAGCGCTTTGACTG</u>            |                       |           |
|                        | M31             | <u>CTCGAGGAATTCGGATCCAGAAGATTATTTCTGTAATTTGATAGAAAAAGC</u> |                       |           |
|                        | M32             | <u>TCTAGAAAGCTTGGATCCATGATTCGATAAATTCATCTATAGCAGCAA</u>    |                       |           |
| <i>Pfcrt</i>           | Crt76 sens      | <u>CTCGAGGAATTCGGATCCGGTGGAGGTTCTTGTCTTGG</u>              | 57°C                  | (1)       |
|                        | Crt76 antisens  | <u>TCTAGAAAGCTTGGATCCATAAAGTTGTGAGTTTCGGATG</u>            |                       |           |
|                        | Crt220sens      | <u>CTCGAGGAATTCGGATCCTTATACAATTATCTCGGAGCAG</u>            | 55°C                  |           |
|                        | Crt220 antisens | <u>TCTAGAAAGCTTGGATCCCATGTTTGAAAAGCATACAGGC</u>            |                       |           |
| <i>Pfcrt</i><br>(cDNA) | F1 sens         | TAATTTCTTACATATAACAAAATGAAATTC                             | 64°C                  | (13)      |
|                        | F1 antisens     | TTATTGTGTAATAATTGAATCGACG                                  |                       |           |
|                        | F2 sens         | TAGGTGGAGGTTCTTGTCTTGGTA                                   | 70°C                  |           |
|                        | F2 antisens     | TCGACGTTGGTTAATTCTCCTTC                                    |                       |           |

**TABLE S2.** Primer sequence used real time PCR.

| Gene             | Primer          | sequence                                  | Reference |
|------------------|-----------------|-------------------------------------------|-----------|
|                  | Pfmdr1F         | TGC ATC TAT AAA ACG ATC AGA CAA A         |           |
| <i>Pfmdr1</i>    | Pfmdr1R         | TCG TGT GTT CCA TGT GAC TGT               | (30)      |
|                  | Pfmdr1 probe    | TTT AAT AAC CCT GAT CGA AAT GGA ACC TTT G |           |
|                  | b-tubulinF      | TGA TGT GCG CAA GTG ATC C                 |           |
| <i>b-tubulin</i> | b-tubulinR      | TCC TTT GTG GAC ATT CTT CCT C             | (30)      |
|                  | b-tubulin probe | TAG CAC ATG CCG TTA AAT ATC TTC CAT GTC T |           |
|                  | maeb1F          | AAA TAT GAA ATT GAA GAA AGA GAC GTA CTT T |           |
| <i>maeb1</i>     | maeb1R          | AAC CGA GTT TGT AAG TTC CTT CTT TTA       | (13)      |
|                  | maeb1 probe     | TGA ATC CGA AAA ATC GAC TAT TTG CCC AA    |           |
